# Supplementary material
Source: Springer Nature journal article supplement (https://www.springermedizin.de/resource/supplementary/13063_2011_1108_MOESM1_ESM.pdf/9619668)
Supplement: MOESM1 [file 9619668]

Intervention

**EXPECTED STANDARD PRACTICE**

Facilities have access to RDTs

Demonstration on RDT use

**PROVIDER INTERVENTION**

Facilities have access to RDTs

Provider Intervention:  
- Training on malaria diagnosis and treatment (includes demonstration on RDT use)  
- Support visits

**PROVIDER + SCHOOL INTERVENTION**

Facilities have access to RDTs

Provider Intervention:  
- Training on malaria diagnosis and treatment (includes demonstration on RDT use)  
- Support visits

School-based Intervention:  
- Train teachers to initiate peer health education on malaria  
-- Support schools to hold malaria events

Effect of intervention on providers and community members

Providers offer rapid diagnostic testing

Providers offer rapid diagnostic testing

Providers know malaria treatment guidelines and can treat based on test result

Providers offer rapid diagnostic testing

Providers know malaria treatment guidelines and can treat based on test result

Improved community awareness of testing and treatment

Effect on the treatment received by febrile patients

Some patients are tested prior to treatment and receive treatment according to malaria guidelines

Moderate increase in the % of febrile patients treated according to the malaria guidelines compared to expected standard practice

Large increase in the % of febrile patients treated according to the malaria guidelines compared to expected standard practice
